# Tools and applications for integrative analysis of DNA methylation in social insects

Claire Morandin<sup>a</sup> and Volker P. Brendel<sup>b,1</sup>

<sup>a</sup>Department of Ecology and Evolution, Biophore, University of Lausanne, 1015, Lausanne, Switzerland; <sup>b</sup>Departments of Biology and Computer Science, Indiana University, Bloomington IN 47405, U.S.A.

This manuscript was compiled on October 26, 2021

**DNA methylation is a common epigenetic signaling tool and an important biological process which is widely studied in a large array of species. The presence, level, and function of DNA methylation varies greatly across species. In insects, DNA methylation systems are reduced, and methylation rates are often low. Low methylation levels probed by whole genome bisulfite sequencing require great care with respect to data quality control and interpretation. Here we introduce BWASP/R, a complete workflow that allows efficient, scalable, and entirely reproducible analyses of raw DNA methylation sequencing data. Consistent application of quality control filters and analysis parameters provides fair comparisons among different studies and an integrated view of all experiments on one species. We describe the capabilities of the BWASP/R workflow by re-analyzing several publicly available social insect WGBS data sets, comprising 70 samples and cumulatively 147 replicates from four different species. We show that the CpG methylome comprises only about 1.5% of CpG sites in the honeybee genome and that the cumulative data are consistent with genetic signatures of site accessibility and physiological control of methylation levels.**

DNA methylation | BS-seq | arthropods | workflow | reproducibility |

**D**NA methylation is a heritable, reversible biological process and a common epigenetic signaling tool that can alter the activity of a gene, via regulating its expression, without changing its nucleotide sequence. DNA methylation is found across a wide array of species, including mammals, plants, insects, bacteria, and fungi (1, 2). However, its functions, biological characteristics, and genomic distribution are distinct for different taxonomic lineages (3).

In insects, the presence and levels of DNA methylation vary greatly (4). DNA methylation systems are reduced in some insect lineages. For example, the *Drosophila melanogaster* genome is missing most of the methylation machinery and, as a result, lacks any detectable DNA methylation patterns (5). The role of DNA methylation in social insects remains enigmatic, even after more than a decade of studies since the initial discovery of a full complement of vertebrate-like DNA methyltransferase genes in the genome of the honeybee *Apis mellifera* (6), including genes encoding the CpG-specific Dnmt1 and Dnmt3. Most strikingly, even within social insect species, DNA methylation is not always present. The gene Dnmt3 seems to have been lost in the genus *Polistes*, thus *Polistes dominula* and *P. canadensis* have greatly reduced genome wide methylation compared to other Hymenoptera species (7).

In insect species where DNA methylation is present, DNA methylation is largely confined to genic regions and elevated in coding regions (1, 2, 8–10). Gene body methylation has been suggested to affect gene expression and function via alternative splicing (8, 9, 11–14), nucleosome stability (15), or regulation

of transcription elongation (16–20). However, its precise function remains unclear (21, 22). It is nonetheless evident that DNA methylation in insects is involved in a wide range of biological processes, such as nutritional control of reproductive status (23), development (9, 24–26), embryogenesis (27), alternative splicing (8, 11–14), host-parasite evolution (28), memory processing (29–31), age-related changes in worker behavior (32), modulation of context-dependent gene expression (33), maternal care (34), defense against territorial intrusion (35), longevity (36, 37), or caste determination in social insects (23, 26, 32, 38, 39).

In honeybee, a standard social insect model organism, the methylome size is reduced and DNA methylation occurs at much lower levels than in vertebrates, with fewer than 1% of CpG dinucleotides methylated (9). The CpG methylation system was demonstrated to be functional, and identification of an active methyl-DNA binding domain encoding gene was suggestive of pathways for molecular recognition of DNA methylation marks (40). The difference of the honeybee genome-based findings compared to the observed scant DNA methylation in the model insect *Drosophila melanogaster* (which lacks Dnmt1 and Dnmt3 genes) (41) raised the possibility of involvement of DNA methylation in the determination of the complex social phenotypes in the honeybee.

DNA methylation has been largely studied by whole-genome bisulfite-sequencing (BS-seq) for different samples, probing a wide variety of developmental and environmental conditions (2, 9–11, 14, 32, 35, 42–52). Although all studies have reported low levels of DNA methylation, restricted almost exclusively to cytosines in CpG context, it has been difficult to compare

## Significance Statement

DNA methylation in the honeybee genome occurs almost entirely at CpG sites. Methylation rates are small compared to rates in mammalian or plant genomes. De novo analysis of all published honeybee methylation studies and statistical modeling suggests that the CpG methylome consists of about only 300,000 sites. The development of a fully reproducible, scalable, portable workflow allows for easy accessible updates of integrative views of all current experiments. The integrated results for the honeybee are consistent with genetic determination of methylation site accessibility by yet uncharacterized sequence features and physiological control of methylation levels at those sites.

V.B. designed the research and tools, implemented the software, and analyzed the data. C.M and V.B. wrote the paper.

The authors declare no conflicts of interest.

<sup>1</sup>To whom correspondence should be addressed. E-mail: [vbrendel@indiana.edu](mailto:vbrendel@indiana.edu)

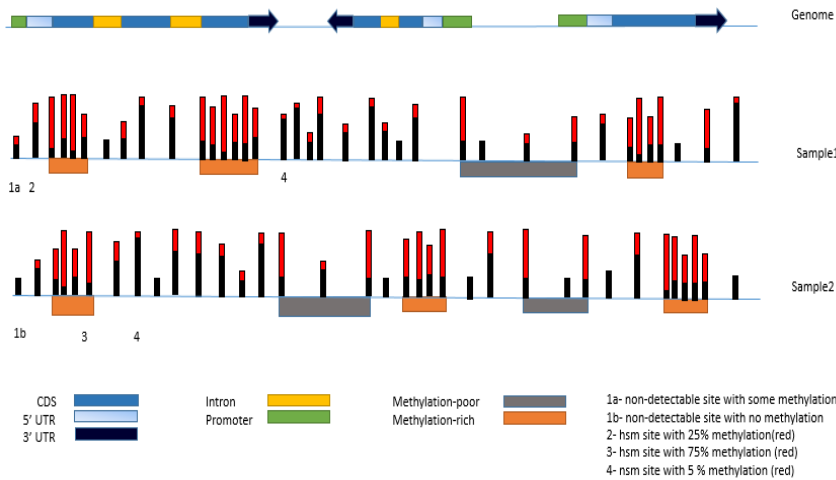

**Fig. 1.** Schematic distribution of methylation sites. Track 1 shows a hypothetical genome annotation, displaying three genes with one to three exons each. Transcriptional direction is indicated by the arrow of the last exon for each gene. Putative promoter regions were defined as 500 bp upstream of the gene annotation start. Tracks 2 and 3 show methylation sites (vertical bars) and methylation-rich and -poor regions (orange and gray horizontal bars, respectively). Methylation percentages are indicated by the relative length of the red portions of the vertical bars. Labeled sites illustrate different classifications, depending on depth of read coverage and the proportion of reads indicating non-converted (presumed methylated) Cs: 1 corresponds to sites with coverage too low to establish methylation status; 2 and 3 indicate highly supported methylation (hsm) sites with methylation levels of 25% and 75%, respectively; 4 labels not significantly methylated (nsm) sites. Thresholds for site classification are discussed in the text.

studies even on the same species due to several factors: (1) potential differences in data quality control; (2) use of different computational methods and detection thresholds; (3) mapping of BS-seq reads to different genome assemblies and annotation versions (e.g., (53)).

Here we present a reproducible, scalable workflow for BS-seq data analysis, tailored to, but not exclusive to, studies of species with low levels of DNA methylation. The workflow provides turnkey computation, starting with just a few edits of configuration files. The implementation works on any UNIX/LINUX system and produces a complete analysis, from data quality control, read mapping, methylation site calling, to statistical analysis of methylation patterns relative to genome annotation. We demonstrate the power of the approach by re-analysis of publicly available BS-seq data for social insects, showing (1) the validity of the workflow by comparison with trusted data sets; (2) critical re-evaluation of published results; (3) re-analysis of published BS-seq data mapped to updated genome versions; (4) evaluation of published BS-seq data relative to an only recently made available genome annotation; and (5) integration and comparative analysis of a large set of published experiments for *A. mellifera*. The integrative analysis provides a solid estimate of the size of the honeybee CpG methylome, and the consistent application of strict data quality control measures suggests alternative interpretations of some puzzling results in the literature.

## Materials and Methods

The following subsections describe the essential elements of the data processing and analyses in this study. Technical aspects are given in full detail in *SI Text*.

**Data sets.** Within the scope of this paper, we collected publicly available BS-seq data from studies on four arthropod species: the paper wasp *Polistes canadensis*, the raider ant *Ooceraea biroi*, the African social spider *Stegodyphus dumicola* (one study each; Dataset S1); and the honeybee *Apis mellifera* (17 different studies; Dataset S2). Another large data set for *Apis mellifera* (nine samples and a total of 30 replicates) by Yagound *et al.* (52) became available after completion of our study but is being discussed as an independent data set to test our conclusions (see section 'Validation').

**Read quality control, mapping, and methylation status analysis.** After standard read quality control (see *SI Text*, 'Read quality control and trimming'), Bismark (54) was used for BS-seq read mapping

(using the Bowtie2 (55) option) and methylation calling. Non-converted reads were filtered using an iterative process (described in *SI Text*, 'Removal of non-converted reads'). A standard binomial test with correction for multiple applications is used to derive reliable sets of methylation sites and levels for analysis (*SI Text*, 'Determination of significant methylation sites'). Only sites that have sufficient coverage of reads to be detectable as statistically solid methylation sites (calls unlikely to have resulted from failed BS-conversion) enter further analysis. These scd sites are distinguished as highly significantly methylated (hsm) sites (with methylation levels unlikely to have resulted from failed BS-conversion) or (otherwise) not significantly methylated (nsm) sites (Fig. 1).

**BWASP workflow.** The entire workflow for obtaining the methylation site data is defined using GNU Make (56) and requires as input only the relevant genome assembly file in multi-FASTA format, and the BS-seq reads, provided either as fastq files or specified for download by NCBI SRA identifiers. To facilitate portability along with reproducibility, the newly developed code is distributed via github (<https://github.com/BrendelGroup/BWASP>), and the entire workflow is encapsulated in a Singularity container (57) that produces identical results in any compatible compute environment (<https://BrendelGroup.org/SingularityHub/bwasp.sif>).

**BWASPR – R scripts for statistical analysis.** Statistical analysis of single base resolution methylation levels calculated by BWASP was done using a suite of R scripts called BWASPR, described in detail in *SI Text*. The code is available on github (<https://github.com/BrendelGroup/BWASPR>) and bundled with all dependencies in another Singularity container (<https://BrendelGroup.org/SingularityHub/bwaspr.sif>).

## Statistical assessment of overlap between different sets of sites.

When comparing two sets of sites from the same genome, assessment of the statistical significance of their overlap amounts to determination whether the overlap is or is not consistent with the two sets being random samples from a shared pool of sites. Comparing scd CpG sets, the candidate shared pool of sites is the set of all genomic CpG sites. Comparing hsm CpG sites, the candidate shared pool of sites is the set of common scd sites. In each case, the size of the shared pool of sites for sampling was estimated using a mark-and-capture approach as described in the legend to Fig. 2. As a scale-invariant measure of overlap we use  $\omega$ , defined as follows. Let  $S_1$ ,  $S_2$ , and  $S_{12}$  be the number of sites unique to sample S1, unique to sample S2, and common between both samples, respectively (Fig. 2), where  $S_1 < S_2$ . Then

$$\omega = \frac{S_{12}}{S_1 + S_{12} + S_2} / \frac{S_1 + S_{12}}{S_2 + S_{12}} \quad [1]$$

gives a value of 0 if  $S_{12} = 0$  (no overlap between samples S1 and S2) and a value of 1 if  $S_1 = 0$  (sample S1 is completely contained in sample S2).

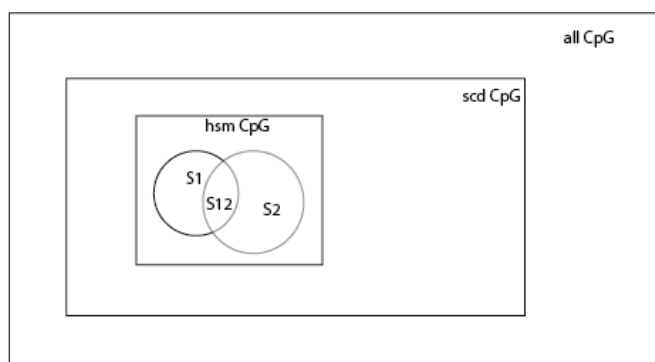

**Fig. 2.** Estimating the number of methylated genomic CpGs. The hsmCpG rectangle represents the set of methylated genomic CpGs that are detectable as a subset of the sufficiently covered, detectable (scd) CpG set, which in turn is a subset of all genomic CpGs. The overlap of two independent random samples  $S_1$  and  $S_2$  of the hsmCpG set provides the mark-and-capture population size estimate for hsmCpG from the identity  $S_{12}/S_2 = S_1/hsmCpG$ , where  $S_{12}$  denotes the overlap between  $S_1$  and  $S_2$ , and italicized labels denote numbers of sites in the respective sets. Multiplying *hsmCpG* by the ratio of the number of all CpGs in the genome over the number of scd sites gives the estimated size of the CpG methylome.

obtained from NCBI SRA as referred to in the published studies listed in Datasets S1 and S2. In total, we re-analyzed publicly available BS-seq read sets of 70 samples and cumulatively 147 replicates from four different species and 20 studies (*SI Text*, Table S1). These re-analyses illustrate how the BWASP/R workflow can be used to rapidly re-evaluate published results, easily re-analyze data in the context of a new genome assembly and/or genome annotation, and, perhaps most importantly, compare and integrate multiple studies in an efficient, consistent manner.

**Description and validation of workflow.** To demonstrate and validate the functionality of the BWASP/R workflows, we chose a medium-sized study with multiple samples and biological replicates. The study compared queen and worker samples (three biological replicates each) from *Polistes canadensis* (59). Our goal was to provide scripts that download the published BS-seq data sets from NCBI SRA and, with minimal initial setup configuration by the user, execute a complete analysis of the data for comparison with the published results. Our implementation is accessible as described in the **Materials and Methods** section.

For the BWASP workflow, three configuration files are needed. In the first file, parameters for the different programs are set to values appropriate for the available computational resources (mostly, number of cores and amount of memory to use; examples are provided in <https://github.com/BrendelGroup/BWASP/data/machines.cfgdir/>). The second file specifies the genome assembly and annotation files. For *Polistes*, this amounts to specifying the NCBI download site for the FASTA genome sequence file and the GFF annotation file (see <https://github.com/BrendelGroup/BWASP/data/species.cfgdir/>). The third configuration file specifies the design and data source of the study:

```
SPECIES=Pcan
GENOME=Pcan.gdna
STUDY=Patalano2015
SAMPLES=( Queen Worker )
NREPS=( 3 3 )
PORS=( p p )
SRAID=( SRR1519132 SRR1519133 SRR1519134 \
        SRR1519135 SRR1519136 SRR1519137 \
        )
```

Here, **SAMPLES** provides labels for the two samples, **NREPS** indicates that each sample has three replicates, **PORS** says that the sequence data are paired-end, and **SRAID** gives the NCBI accession numbers for the data sets. After these preparatory steps,

```
xsetup -m mycpu -s Pcan Patalano2015
```

will generate a complete directory structure populated with the data files and workflow makefiles, ready for execution (**mycpu**, **Pcan**, and **Patalano2015** refer to the three configuration files, respectively). In general, the user can of course alternatively specify local files instead of download sites, for example in case pre-publication genome, annotation, or BS-seq data are to be analyzed.

A complete script for running the BWASP workflow for this example is given in *SI Text*, 'BWASP workflow: design and output.' The entire process, including download of all required code (bundled as a Singularity image), involves fewer than a dozen lines of commands and creates 266 Gb of output files (in about 12h on our old 32-processor Linux server).

**Distribution of methylation sites: co-occurrence with annotated genome annotation.** To correlate methylation site occurrence with transcriptional activity, site density was calculated per genome feature type, including genic (exon and intron) and intergenic (promoter and other). For the purpose of these statistics, promoter simply refers to the region 500 nucleotides upstream of the annotated 5'-end of a gene, or shorter to avoid overlap with an upstream gene annotation. Site density was defined as number of sites within a feature divided by feature length and is reported as values normalized per 10kb. For exons, statistics were also calculated for the subcategories 5'-UTR, CDS, 3'-UTR, and Other (non-coding genes). Expected values were derived under the assumption of random positioning of sites relative to annotated genome features.

**Comparing ranked lists.** The BWASPR workflow generates lists of genome regions (genes and promoters) ranked by extent of methylation (density of hsm sites or overall methylation level), presented as tab-delimited files in output directory RNK. It is of interest to compare such lists between different samples to determine whether the same regions are relatively hypermethylated under different conditions. List comparisons can be made with the included script **xcmprnks** which calculates the rank-biased overlap (**rbo**) measure (58) for all pairwise comparisons of specified lists. Parameters to the script include the number of ranks to consider (default: 40), the **rbo** parameter  $p$  (default: 0.95), and, for statistical evaluation, the number of ranks to shuffle (default: 40), the number of permutations to generate (default: 100), and the significance level  $t$  for evaluation (default: 5%). The permutation test is performed by randomly shuffling the association of identifier (e.g., gene name) and the corresponding ranked score. Observed **rbo** values in the top  $t$  % of values generated by shuffling are starred as significant, indicating more than expected overlap of the ranked lists.

## Results

The BWASP/R workflow proceeds through a large number of steps, from data download and quality control to read mapping, statistical and visual annotation of results, and testing for significant methylation differences between groups of biological samples. Our aim is to offer researchers a reliable, stress-free, and reproducible method to analyze whole-genome bisulfite sequencing data sets, especially targeting data sets with low methylation rates, as observed in insects. In order to demonstrate the many ways our workflow can be beneficial, short read data generated from bisulfite-treated genomes were



251 Obviously, running times will vary with available resource  
252 allocation. For comparison, we also ran the worker samples  
253 on the Indiana University Carbonate cluster (<https://kb.iu.edu/d/aolp>),  
254 allocating one node with 16 threads, which produced  
255 identical results in five hours.

256 The point we wish to make here is that the user time  
257 to set up the workflow is marginal, while the computational  
258 execution is roughly overnight without any additional user  
259 intervention. Moreover, the workflow takes advantage of the  
260 GNU Make environment (56) that allows seamless integration  
261 of different parts of the computation run separately. For  
262 example, downloading the raw data from NCBI SRA can be run  
263 independently first to make sure that there is no interference  
264 by network problems. For large data sets, each replicate can  
265 be run separately, followed by the cumulative sample analysis.  
266 Depending on available resources and queuing times on a  
267 computing resource, such strategies can enhance real-time  
268 performance. It is these workflow design features that enable  
269 the large-scale, multi-study integration of experimental data  
270 being presented here.

271 The dependencies of the workflow are depicted in Figs. S1-  
272 S3, and details are discussed in *SI Text*, 'BWASP workflow:  
273 design and output.' Briefly, the workflow takes the raw BS-seq  
274 input data, subjects the data to several quality filtering steps,  
275 and ultimately derives \*.mcalls files that for each C context  
276 record position, read coverage, and percent methylation for  
277 every sufficiently covered (scd) site in the genome. Data are  
278 derived initially for each replicate and then cumulated for each  
279 sample. Given sufficient coverage, between-replicate compar-  
280 isons can probe the robustness of between-sample comparisons.  
281 Per sample mapping statistics for the *Polistes canadensis* study  
282 are shown in Dataset S3. Cumulative read numbers are seen to  
283 be in excess of 90 million per sample, with a mapping efficiency  
284 of about 83%. Two to three million of the mapped reads per  
285 sample were identified as PCR duplicates and removed.

286 While the starting point of the analysis presented here is the  
287 same as what is presented in (59) and in each case the Bismark  
288 (54) software was used to make methylation calls, different  
289 quality control setting choices may impact result details. Here,  
290 our mapping efficiency is about 10% higher than reported in  
291 (59) due to our slightly more error-tolerant bowtie2\_min\_score  
292 setting. More importantly, inclusion of removal of low quality  
293 reads, PCR duplicates, and likely unconverted reads as done  
294 in the BWASP workflow is not discussed in (59) (although a  
295 procedure for elimination of false positive methylation regions  
296 is described). Our point here is not to argue for particular  
297 choices of quality control but to emphasize that the workflow-  
298 enabled approach allows transparent re-analysis, either with  
299 original or with modified workflow steps and parameter sets.

300 The final genome coverage was estimated as 35.8 for the  
301 queen sample and as 31.7 for the worker sample (Dataset-S3).  
302 Five to eleven 5'-positions and one to three 3'-positions of the  
303 mapped reads were significantly biased for methylation calls  
304 and conservatively ignored for summary results (see *SI Text*,  
305 'BWASP workflow: design and output.') Overall, more than 80%  
306 of CpG sites were covered by at least one read, and 21.32%  
307 and 24.73% of CpG sites were covered by at least 20 reads  
308 in queen and worker, respectively (Dataset S5). There were  
309 13,840 and 12,036 hsm CpG sites identified in the queen and  
310 worker samples, respectively, corresponding to the fractions  
311 0.16% and 0.15% of scd CpG sites (Dataset S7). Overall

CpG methylation levels were calculated as 0.99% for queen  
and 0.98% for worker (Dataset S9). Patalano *et al.* (59)  
report the global CpG methylation level as 2.79%. Beside  
the aforementioned differences in data quality control, their  
estimate was based on averaging over values in 1-kb windows  
that excluded regions with fewer than 20 methylation calls  
and thus should be higher than BWASP reported overall level.

Further analyses of the methylation calls (\*.mcalls output  
files from BWASP) were done via the BWASPR workflow, again  
facilitated by user-supplied configuration parameters. Settings  
and output for the *Polistes* study are shown in Dataset S15.  
The workflow compiles a large number of statistics concerning  
the extent and distribution of methylation (for details, see *SI  
Text*, 'BWASPR - R scripts for statistical analysis.'). Here we  
highlight the design aspects of the analysis that are tailored to  
the problem of producing reliable estimates in view of very low  
overall methylation rates (and, typically, less than statistically  
desirable read coverage for replicate samples).

Key to our strategy is to discard all methylation call data  
at sites that are covered by fewer than  $t$  reads, where  $t$  is  
calculated as the minimal coverage required for a binomial test  
to detect statistically significant methylation at the site (as  
opposed to chance events due to incomplete BS-conversion).  
For the *Polistes* study,  $t = 4$  (*SI Text*, 'Determination of signi-  
ficant methylation sites'). Thus, low coverage sites (examples  
labeled "1" in Fig. 1) are ignored in subsequent analyses.

About 70% of the hsm CpG sites are in annotated genes,  
with about 3.5-fold over-representation of within-exon sites  
(Dataset S11). Dataset S13 provides more detail and shows  
that more than 90% of these exonic sites occur in coding  
sequences. These data would seem to nuance the Patalano  
*et al.* (59) observation of "relatively little gene body-specific  
methylation targeting," which was based on overlap with  
highly methylated regions rather than analysis of methylation  
sites. BWASPR combines site-based and region-based analyses  
as shown in Fig. 1. In particular, methylation-rich and -poor  
regions are determined as clustering or overdispersion of sites  
(*SI Text*, 'Methylation-rich and -poor regions (MRPR)') as  
an empirical proxy for statistical  $r$ -scan analysis (following  
ideas reviewed in (60)). For the *Polistes* data, it is clear that  
there is great variation in the dispersion of methylation sites,  
ranging from tight clustering to stretches of multiple hundred  
kb devoid of any sites (see Dataset S15, pp. 170-187).

Fig. 3 illustrates the complementarity of the site density  
versus regional methylation measures. Genes of lengths 500 to  
5000 bp with at least five hsm sites were measured by overall  
percent methylation and hsm site density. A wide scatter is  
seen, indicating both genes with relatively high density of sites  
but relatively low overall methylation level, and vice versa.

In summary, this case study demonstrates the validity and  
capabilities of the BWASP/R workflow as well as the difficulty  
of detailed comparison with previous computational results  
for which precise reproduction is rendered impractical or even  
impossible without the original analysis scripts. The latter  
theme is taken up also in the next case study, which shows that  
an easy-to-use workflow enables individualized re-evaluation  
of published results - and thereby scientific discussion beyond  
the point of initial peer review. For practical considerations of  
how to adapt the workflow to analysis of very large genomes  
with limited computing resources please see *SI Text*, 'Case  
study of a large genome.'

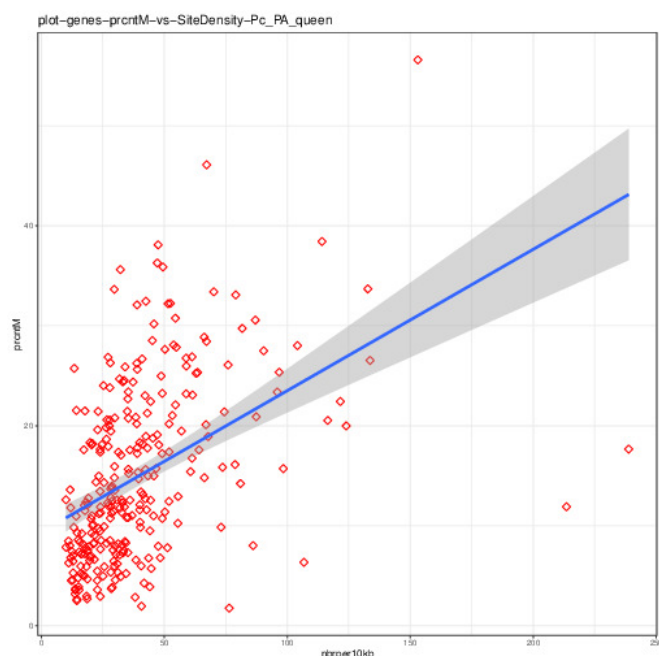

**Fig. 3.** Correlation of two methylation measures for genes. The y-axis score is the overall methylation percentage for a gene. The x-axis score is the number of `hsm` sites in the gene, normalized to 10kb length.

significant non-CpG methylation (11, 42). For a consistency check, we set up a **BWASP/R** re-analysis of the deposited BS-seq data, following the analogous procedure described in the previous section. Our analysis gave consistent results with previous studies, tallying only 13 and 30 CHG and 54 and 104 CHH sites in fertilized and thelytokous embryos, respectively (Dataset S8). It would seem, therefore, that the surprising numbers of non-CpG methylation sites reported in (45) reflect software and parameter choices.

Our concern here is not to investigate all possible causes for the widely discrepant results but rather to demonstrate how **BWASP/R** allows nearly effortless re-analysis of published BS-seq studies, with complete documentation and reproducibility, as well as the flexibility to change parameter settings for robustness of results analyses. For this example, several differences in the respective methods stand out: 1) Mapping efficiency and quality control. **BWASP** yields mapping efficiencies of 39.3% and 32.9% for the two data sets; after mapping, 1.76% and 2.31% of the reads were identified as PCR duplicates and removed (Dataset S4). No mapping efficiencies nor PCR duplicate removal are discussed in (45). It is likely that the more stringent quality control choices in **BWASP** (including also removal of non-converted reads; see *SI Text*) explain the lower coverage reported in Dataset S6 relative to (45). 2) Correction for potential incomplete BS-conversion by a binomial test with false discovery rate adjustment (*SI Text*, 'Determination of significant methylation sites') yielded a minimum per site read coverage of four for reliable methylation site detection in our workflow, compared to a coverage of two in (45). The very low number of common non-CpG methylation sites detected by the authors (only 561, compared to about 75,000 postulated common CpG sites) suggests to us that their threshold setting is too liberal and that our more conservative approach correctly shows lack of significant non-CpG methylation, consistent with other studies (discussed in more detail below in the section 'Non-CpG methylation').

**Workflow-enabled exploration of grouping and aggregation statistics.** Replication and aggregation statistics are essential to any typical large-scale multi-sample data analysis, and BS-Seq studies are no exception. Clearly, the per site methylation percentages are aggregate statistics over multiple DNA molecules in the respective sample. In some studies, it may not be clear a priori how the input data should be partitioned into homogeneous samples when several biological criteria can be used to group samples before comparing methylation patterns. For example, pooling different cell types may be acceptable for some questions about DNA methylation status but not when cell type specific methylation is being probed. A random partitioning of data may be the most desirable option to serve as a control for differences between biologically motivated groupings of samples.

Here, we illustrate how the **BWASP/R** workflow can easily be run to provide the requisite analyses for different data partitionings, with only minimal editing of the workflow configuration files. We chose to replicate a study by Libbrecht *et al.* (13), in which the authors compared reproductive (R phase) and brood care (BC phase) samples from the the clonal raider ant *Ooceraea biro* (known as *Cerapachys biro* at the time).

The authors discussed analysis of three data partitionings: (1) R phase versus BC phase with four replicates each, derived

373 **Using workflow-enabled re-analysis to evaluate published re-**  
374 **sults.** One motivation for our work was to significantly lower  
375 the burden of computational reproducibility. A frequently  
376 encountered problem is that a computational analysis depends  
377 on a large number of software and parameter choices. If the  
378 analysis yields surprising results, one has to evaluate whether  
379 the findings reflect biologically significant features or whether  
380 differences in software and parameter choices provide the ex-  
381 planation. If the analysis can easily be re-run with changed  
382 parameters, for example, then this would provide more robust  
383 evaluation. In current practice, publications rarely provide  
384 enough details to completely reproduce a genome-wide com-  
385 putational analysis, and even if one succeeded in such effort,  
386 it would likely be a highly time-consuming task.

387 For DNA methylation studies, **BWASP/R** offers a solution  
388 that allows authors and readers to easily re-evaluate and fairly  
389 compare results. For illustration, we discuss **BWASP/R** results  
390 for the data reported in (45). The paper analyzed differential  
391 DNA methylation patterns in *Apis mellifera capensis* female  
392 embryos produced either sexually by fertilization of eggs with  
393 sperm or asexually from two maternal genomes via a process  
394 called thelytokous parthenogenesis. The central goal of the  
395 study was to probe parent-of-origin effects on DNA methy-  
396 lation, and the authors' thorough analysis showed patterns  
397 of differential methylation between the two types of embryos,  
398 consistent with genomic imprinting. However, effects of *cis*-  
399 mediated allele-specific methylation were also demonstrated  
400 and shown to confound interpretation of the genome-wide  
401 analysis.

402 As a surprising collateral result of the study, the authors re-  
403 ported a high level of non-CpG methylation at over 50,000 sites,  
404 compared to the 114,156 and 99,923 methylated cytosines in  
405 the CG context detected in fertilized and thelytokous embryos,  
406 respectively. Only few studies on honeybees have revealed

468 from two clonal lineages (A and B) and two batches of library  
469 preparation and sequencing (1 and 2); (2) Four separate compar-  
470 isons of R phase versus BC phase with two replicates each  
471 (i.e., A1 samples of R phase versus A1 samples of BC phase;  
472 and the same for A2, B1, and B2 samples); (3) Comparison of  
473 the eight individual samples.

474 Any of these partitionings (and more, e.g., grouping by line  
475 or batch) are easily analyzed with the BWASPR workflow. All  
476 that is required to change the data partitioning are minor,  
477 intuitive edits to the configuration file, specifying the design  
478 and data source of the study. Samples to be compared are  
479 indicated in the `samplelist` variable. For example, compar-  
480 ing the phases with four replicates each, samples are specified  
481 as `BCphase` and `Rphase` (Dataset S17, page 1), whereas the  
482 global comparisons of the eight individual samples is indicated  
483 by labels `BCphaseA1`, `BCphaseA2`, etc. (Dataset S18, page  
484 1). The corresponding `.dat` file includes columns with the  
485 species name, the name of the study, the samples to compare  
486 (matching the labels in the configuration file), the replicate  
487 number detailing whether the samples should be aggregated  
488 or analyzed individually, and the locations of the respective  
489 `*.mcalls` files (Dataset S17, pages 4-6). After these prepara-  
490 tory steps, BWASPR can be executed with the generic script as  
491 before (*SI Text*, 'BWASPR – R scripts for statistical analysis').

492 **Similarity of DNA methylation patterns.** Similarity of DNA methy-  
493 lation patterns across individuals, or groups of individuals,  
494 can be assessed on different levels. The BWASPR package im-  
495 plements functions and scripts to calculate all of the following  
496 measures.

497 (1) To what extent do two sets of methylation sites overlap,  
498 i.e., are the two corresponding samples methylated at the  
499 same sites? The output directory `PWC` shows common and  
500 unique sites comparing two samples (or groups of samples)  
501 and calculates an overlap index indicating the degree of con-  
502 gruence between them (see Methods, 'Statistical assessment of  
503 overlap between different sets of sites'). The overlap index is  
504 normalized to a value between 0 and 1, with 1 indicating that  
505 one set is contained in the other, and 0 indicating absence of  
506 any overlap. Results for the 28 pairwise sample comparisons  
507 are shown in Table S2. Values range between 0.75 and 0.91,  
508 indicative of high pairwise overlap of `hsm` CpG sites.

509 The overlap index measure is easily extended to multiple  
510 sample comparisons: How large are the sets of methylation  
511 sites shared between biologically motivated groups of samples  
512 relative to groups of samples generated by random assort-  
513 ment? BWASPR includes the script `hsmsetcmp.pl` which counts  
514 the `hsm` CpG sites shared between particular subsets of a set of  
515 `*CpGhsm.mcalls` files. This script is a generalization of a clever  
516 approach by Libbrecht *et al.* (13) who analyzed the separation  
517 of two sets of four samples by a simple criterion: how many  
518 sites are consistently methylated in one set versus consistently  
519 unmethylated in the complementary set? For their data, one  
520 would hypothesize that if differential DNA methylation were  
521 associated with behavioral phase, then the set of brood care  
522 phase samples compared to reproductive phase samples should  
523 be significantly more consistent than other partitions of the  
524 eight samples, including partitions by line or by sequencing  
525 batch. Their data (figure S3 of (13)) did not support that  
526 hypothesis and in fact showed a surprising outlier point for  
527 the partitioning by sequencing batch. The generalized BWASPR  
528 results are available as Dataset S19, showing results for all

529  $2^8 = 256$  partitionings of the eight samples. The homogeneity  
530 of the samples is indeed striking. The second largest site count  
531 occurs for the partitioning of all samples sharing `hsm` status  
532 (following the expected, overwhelming count of all samples  
533 being `nsm`), tallying a count of 136,608 sites. Fig. S5 shows the  
534 equivalent of figure S3 of (13), based on BWASPR determined `hsm`  
535 and `nsm` sites. While our data are consistent in not showing  
536 any evidence of differential DNA methylation by phase, there  
537 is no outlier behavior for the partitioning by sequencing batch.  
538 It is conceivable that the corresponding data point reported  
539 by (13) is an artifact of their data processing, in particular  
540 the apparent lack of PCR duplicate removal (their data pro-  
541 cessing was done using a protocol for reduced representation  
542 bisulfite sequencing, which relies on PCR quantification, while  
543 their experimental protocol was BS-seq, which relies on PCR  
544 duplicate removal); according to Dataset S7, sequencing batch  
545 2 had on average 29.3% PCR duplicates, much higher than  
546 the 19.3% for batch 1.

547 (2) How well do the methylation percentages at the sites  
548 common to the two samples correlate? Groups or individuals  
549 may show similar methylome size and location, but perhaps  
550 may differ largely in the level of methylation present at these  
551 sites. BWASPR calculates the correlation in methylation per-  
552 centage across all common sites between groups or individuals.  
553 The correlations are shown in the output directory `CRL` (deter-  
554 mined as described in *SI Text*, 'Correlations between aggregate  
555 samples') and summarized here in Table S2. The high values  
556 ranging between 0.90 and 0.93 show that not only are the  
557 methylation sites highly conserved between the samples but so  
558 are the methylation levels at the common sites. These results  
559 are in accord with the observation by Libbrecht *et al.* (13)  
560 that DNA methylation was not associated with reproduction  
561 and behavior in the context of colony cycles in *O. biroi*.

562 (3) How similar are respective lists of genome features  
563 (genes, promoters) ranked by degree of methylation? Ranked  
564 lists of genes and promoters are given in output directory  
565 `RNK` and compared by the rank-biased overlap measure (58)  
566 implemented via the BWASPR script `xcmprnks` (see **Materials**  
567 **and Methods**). Results for the comparison of the sample  
568 gene lists ranked by site density are shown in Table S3. Six  
569 of the 28 pairwise comparisons show significant congruence of  
570 the ranked lists, however there is no pattern of similarity by  
571 grouping, neither by phase, nor line, nor batch.

572 **Re-analysis by read mapping to a novel genome assembly and anno-**  
573 **tation.** As sequencing technologies advance or new resources  
574 become available, the reference genome and annotation of a  
575 species of interest may have been updated for a current BS-  
576 seq study relative to previously published work. In order for  
577 the current work to be comparable to the previous work, one  
578 would ideally have the analyses done with respect to the same  
579 reference genome and annotation. Thus, one option would  
580 be to re-run the previous analyses as published, but now on  
581 the new genome. This is not a small task, and ultimately it  
582 would be nearly impossible for any reader to repeat the au-  
583 thors' steps with the new genome - unless that work was done  
584 with a reproducible workflow. A second option is to apply the  
585 current workflow to all data sets and, potentially, to both the  
586 previous and current reference genome and annotation. This  
587 can be done very easily with BWASPR/R, as reviewed in *SI Text*,  
588 'Re-analysis by read mapping to a novel genome assembly and  
589 annotation'.



590 **Integrative analysis of multiple *Apis mellifera* BS-seq studies.**

591 Of all arthropod species, DNA methylation has been studied  
 592 the most in the honeybee *Apis mellifera*, going back to the  
 593 initial demonstration of a functional CpG methylation system  
 594 (40) that accompanied the genome paper (6). However, 15  
 595 years of research have not clarified the precise role of DNA  
 596 methylation in diverse processes like development, caste dif-  
 597 ferentiation, or gene regulation. An integrated picture of the  
 598 various experimental studies has been difficult to obtain be-  
 599 cause of a number of complicating factors. First, since the  
 600 initial genome release, multiple updates to the genome as-  
 601 sembly and annotation make comparisons between older and  
 602 more current studies cumbersome. Second, studies are highly  
 603 variable in terms of computational data processing, relying on  
 604 distinct data quality control, software, and parameter choices,  
 605 thus obscuring differences in reported results due to technical  
 606 rather than biological factors. Third, documentation of com-  
 607 putational details and interim results (rather than interpreted  
 608 summaries) has been lacking, making precise comparisons  
 609 across studies impossible.

610 Our re-analysis of published BS-seq data sets overcomes  
 611 the aforementioned problems. First, all data were mapped  
 612 to the most current NCBI *Apis mellifera* reference genome as-  
 613 sembly (63), deposited as version HAv3.1 (64) and annotation  
 614 release 104 (65). Second, all data sets were analyzed with  
 615 the same BWASP/R approach, ensuring consistent data quality  
 616 control. Third, the BWASP/R workflow guarantees complete  
 617 reproducibility as all required software is available with this  
 618 publication, together with all interim and final results.

619 Our integration over multiple studies addresses the follow-  
 620 ing questions: To what extent are the same genomic CpG  
 621 sites methylated in different samples? Conversely, what sites  
 622 have rarely or never been seen methylated? The answers to  
 623 the first two questions describes the observed and estimated  
 624 CpG methylome as a subset of all CpG sites in the genome.  
 625 Another question addresses the evidence for differential methy-  
 626 lation between biologically distinct samples, evaluated not only  
 627 within each study but also across different studies. Lastly, we  
 628 probe the extent of non-CpG methylation, based on consistent  
 629 computational assessment of all available data sets.

630 **Summary statistics.** At the time of completion of this work, we  
 631 analyzed 17 BS-seq studies on *Apis mellifera* (Dataset S2),  
 632 comprising 58 samples, a total of 126 replicates, and overall  
 633 more than 13.7 billion processed reads (*SI Text*, Table S1). We  
 634 observed a wide range of mapping efficiency, PCR duplicates,  
 635 and genome coverage, but on average 94% and 38% of CpG  
 636 sites were covered by at least one read and by 20 or more reads,  
 637 respectively (Datasets S4 and S6; *SI Text*, Table S1). Thus, in  
 638 aggregate, a large part of the CpG methylome has been probed  
 639 under some conditions, supporting our goal of providing an  
 640 integrated view of DNA methylation of the honeybee genome.

641 **Determination of the CpG methylome.** Coverage of the 19, 687, 378  
 642 genomic CpG sites in the 58 samples range such that between  
 643 4.79% and 98.53% of sites were sufficiently covered for **hsm**  
 644 detection (Dataset S8). Numbers of **hsm** sites detected in each  
 645 sample range from 8, 540 to 187, 243 (Dataset S8), totaling  
 646 6, 634, 422 identifications. The **hsm** fraction of **scd** sites ranges  
 647 between 0.18% and 1.15%. Overall CpG methylation rates  
 648 were determined in the range 0.38% – 1.98%, with an average  
 649 of 0.99% (Dataset S10).

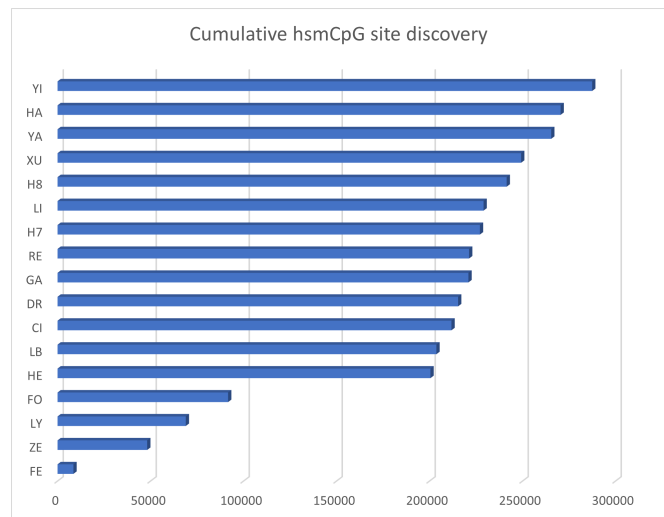

Fig. 4. Novel **hsm** CpG site identification by successive experiments. The row labels refer to the *Apis mellifera* studies listed in Dataset 2, from earliest (bottom) to latest (top). The horizontal bars show the cumulative number of sites discovered from earliest to current study.

650 Dataset S12 data show that on average 94.5% of all **hsm**  
 651 CpG sites are found in annotated genic regions, which however  
 652 is only 1.15 times more than expected if genomic sites were  
 653 picked randomly irrespective of annotation (Dataset S12). Fur-  
 654 ther inspection shows that on average 83.78% of all **hsm** CpG  
 655 sites are in exons, which is 4.83 times higher than expected.  
 656 But note that on average only 3.98% of exonic **scd** sites are  
 657 identified as **hsm**. Within exons, the vast majority of the **hsm**  
 658 CpG sites are within protein coding sequences, about 2-fold  
 659 higher than expected based on random selection of sites any-  
 660 where in the exon regions, the balance being in untranslated  
 661 mRNA regions and non-coding RNAs (Dataset S14).

662 Fig. 4 shows the cumulative number of *Apis mellifera* CpG  
 663 sites identified as **hsm** in any of the 17 analyzed studies, ordered  
 664 by time of publication. The total number of sites discovered  
 665 stands at 287,455 (calculated over all 58 samples). The graphic  
 666 shows that rapid initial discovery of sites has slowed to appar-  
 667 ently asymptotic increases now.

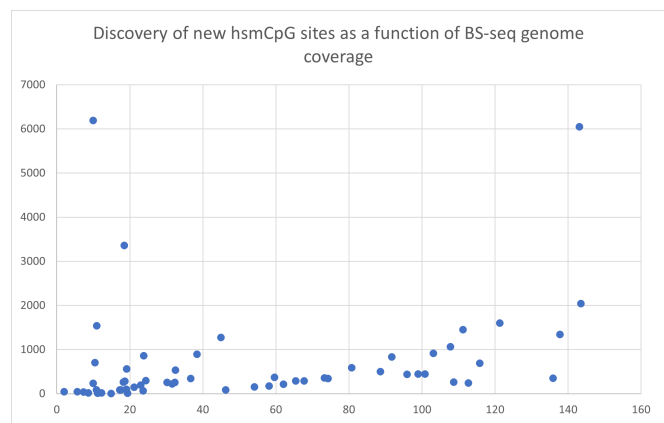

Fig. 5. The graph shows the number of novel **hsm** CpG sites discovered in each of the 58 *Apis mellifera* studies shown in Dataset S4, ordered by genome coverage of the respective BS-seq data set.

668 To probe whether the increases in number of sites (or lack  
669 thereof) is entirely explained by the genome coverage values  
670 of the respective BS-Seq experiments, we plotted the number  
671 of sites that are unique to each sample relative to the genome  
672 coverage of the sample (Fig. 5). It is seen that there is no clear  
673 correlation, with some high coverage samples contributing  
674 few novel sites and some low coverage sites contributing large  
675 numbers. The two outlier samples with more than 6000 unique  
676 sites each are from the YA (49) study on sperm. As sperm  
677 has been relatively under-sampled compared to other tissues  
678 (Dataset S2), this result may reflect caste- and tissue-specific  
679 DNA methylation.

680 The relative lack of unique sites in high-coverage samples  
681 could result from high-coverage studies on multiple similar  
682 samples, thus with few sites that are unique to a single sample.  
683 To explore this possibility further, Fig. 6 shows a Venn diagram  
684 of site overlap between all previous studies and the two most  
685 recent data sets available at NCBI SRA. It is seen that these  
686 two large experiments contribute 22,022 novel sites (16,979  
687 unique to YI; 2,940 unique to HA; and 2,103 observed in both  
688 but not in earlier studies).

689 Lastly, Fig. 7 records the numbers of hsm CpG sites shared  
690 by several samples in the set of experiments analyzed. The  
691 figures gives further evidence to considerable overlap between  
692 sets of sites shown as methylated in different samples. We  
693 cannot exclude the possibility that others sites are going to be  
694 found methylated under different physiological conditions from  
695 those that have been used in current experiments. However,  
696 a consistent, straightforward interpretation of the integrative  
697 analysis over all studies would seem to be that the *Apis mellifera*  
698 CpG methylome is far smaller than the set of all genomic  
699 CpGs and closer in size to the currently observed 287,455  
700 value.

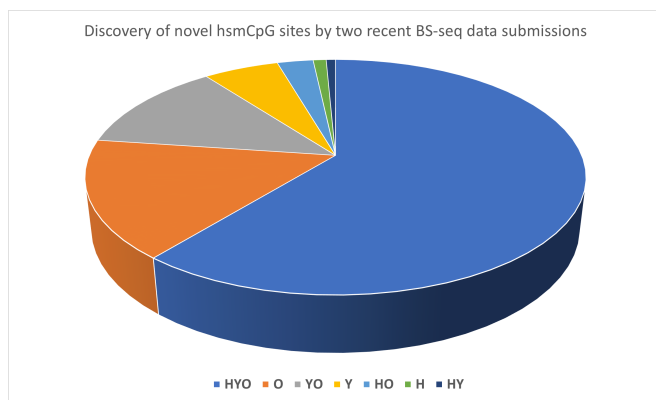

701 **Fig. 6.** Novel hsm CpG sites discovered by the most recent *Apis mellifera* BS-seq  
702 studies. Abbreviations used: H = H7 (50); Y = YI (51); O = all other studies (see  
703 Dataset S2). Overlap sets are labeled by the respective combination of letters. The  
704 numbers of sites in each segment are: HYO, 178162; O, 47600; YO, 36603; Y, 16979;  
705 HO, 8111; H, 2940; HY, 2103.

701 **Features of methylated CpG sites.** To further explore character-  
702 istics of CpG methylation sites, we applied the BWASP script  
703 `hsmsetexplore.pl` to the set of `*.mcalls` files of the 58  
704 *Apis mellifera* samples. The script output shows that of the  
705 19,687,378 CpGs in the *Apis mellifera* genome, 19,544,535  
706 (99.27%) were identified as `scd` in at least one sample, but  
707 only 287,455 (1.46%) as `hsm`. 91,043 sites were identified as

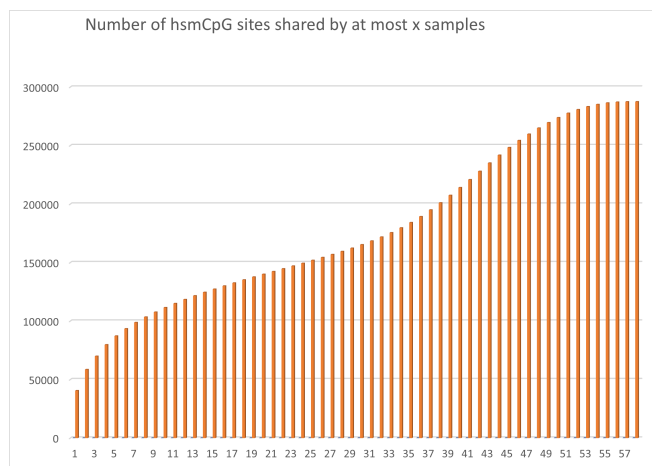

708 **Fig. 7.** The graph shows the number of hsm CpG sites shared by the x-axis indicated  
709 number of experimental *Apis mellifera* samples shown in Dataset S2. For example,  
710 there are 40,545 sites unique to one experiment and 58,607 sites seen in only two  
711 samples.

712 `scd` in all 58 samples, but only 57 sites as `hsm`. Thus, the  
713 CpG methylome is small relative to the entirety of all genomic  
714 CpGs and to a large extent conserved under different condi-  
715 tions (as shown in the previous section), but still modulated  
716 in sample-specific manner. On average, 0.69% of CpG sites  
717 that are `scd` for the Cs on both forward and reverse strand  
718 are `hsm` in both positions, with 0.06% each being `hsm` on only  
719 forward or reverse strand, respectively. In the following we  
720 focus on CpG sites methylated on both strands.

721 We used the `hsmsetexplore.pl` script to pull out represen-  
722 tative highly methylated sites (criteria: read depth between 33  
723 and 330; at least 90% methylation on both strands; shared by  
724 at least 15 samples) and strongly non-methylated sites (criteria:  
725 read depth between 33 and 330; at most 4% methylation on  
726 both strands; shared by at least 15 samples), which generated  
727 1,183 and 782,849 sites, respectively. We further restricted  
728 these sets to unique sites (no overlap of +/-25 base segments  
729 around the CpG with other sites in the set) and differenti-  
730 ated sites completely within coding regions from sites with  
731 no overlap with coding regions (again including 25 nucleotide  
732 flanks) to end up with four sets: `hhCDS` (553 highly methylated  
733 sites in coding sequences); `hhNCS` (213 highly methylated sites  
734 in non-coding sequences); `nnCDS` (858 non-methylated sites  
735 in coding sequences); and `nnNCS` (950 non-methylated sites  
736 in non-coding sequences). (The `nn` sets have the additional  
737 constraint to include only sites shared by at least 17 or 25  
738 samples, respectively, to generate set sizes similar to those for  
739 the `hh` sets.) There is no rationale for the parameters used  
740 other than to generate sets of several hundred sites each that  
741 are representative to the most consistently methylated and un-  
742 methylated sites in coding and non-coding regions. Standard  
743 sequence logos for each set (reflecting the frequency distribu-  
744 tion of nucleotides in the positions around the CpG) are shown  
745 in Fig. 8. No obvious diagnostic motifs are found that corre-  
746 late with consistently high methylation. We note, however,  
the strong 3-periodic signature unique to the `hhCDS` set. It is  
therefore conceivable that a methylation code is hidden in  
the third codon positions of the coding sequences surrounding  
strongly methylated CpGs.



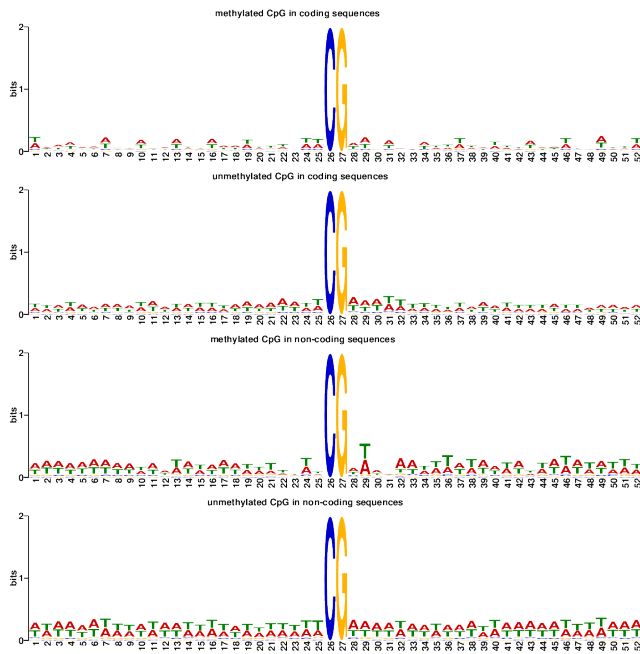

**Fig. 8.** Sequence logos produced by the MEME software for CpG sites from four distinct sets, in order top to bottom: highly methylated sites in coding sequences; strongly non-methylated sites in coding sequences; highly methylated sites in non-coding sequences; and strongly non-methylated sites in non-coding sequences.

tion was observed between 0.38% and 1.98%, with a mean of 0.99%; CHG methylation was observed between 0.06% and 0.94%, with a mean of 0.34%; and CHH methylation was observed between 0.06% and 4.72%, with a mean of 0.58%. However, CHH methylation in excess of 1.0% was observed in only five samples, and without those samples, the average is 0.35%. Thus, significant CHH methylation levels remain outliers. The five samples are: queen and worker samples of Foret *et al.* (11); the data of Cingolani *et al.* (42) on European and Africanized bees; and the low count sperm sample of Yagound *et al.* (49). Looking at the fraction of *scd*CHH sites that are *hsm*CHH (Dataset S8), the 2.5% value of the low count sperm sample of Yagound *et al.* (49) is the only outlier (noted also in (49), but not pursued by the authors); without that data point, the average is 0.05% (compared to 0.69% for CpG sites). Thus, our global analysis confirms the impression that DNA methylation in honeybee is overwhelmingly in CpG context, consistent with observations in other social insect species (e.g., (66)). Obviously, this computational result does not preclude the possibility of biologically significant non-CpG methylation at specific sites. A recent study by Harris *et al.* (50) postulates that low level but elevated CpA methylation in CpG-methylated genes in honeybee head tissues may be involved in the regulation of gene expression during development.

**Validation.** After completion of the data analyses described above, Yagound *et al.* published another DNA methylation study on *Apis mellifera*, comparing methylation sites and levels between drones (samples of DNA taken from thorax labeled as "drone" and samples from semen labeled as "semen") and their daughters derived from instrumental insemination of queens ("worker" samples) (52). The goal of the study was to investigate the existence of epigenetic inheritance, and the authors concluded that there is no DNA methylation reprogramming in bees and that epigenetic information is transferred from fathers to daughters within patriline. The author's interpretation has been critically discussed (67, 68). Here, we have pursued two major aims with our re-analysis of the study's BS-seq data via our BWASP/R workflows: (1) We wanted to know whether the new data are consistent with our earlier findings on the size of the CpG methylome and the lack of non-CpG methylation; (2) We wanted to probe the robustness of the published similarities of DNA methylation patterns within patriline for different methylation site selection criteria and with respect to the different BWASPR-implemented similarity measures.

Summary statistics for the aggregate samples from colonies B1 and B2 (four replicates each for drone, semen, and worker) and colony B4 (two replicates for drone, semen, and worker) have been added to Datasets S4, S6, S8, S10, S12, and S14. All samples give high genome coverage (97X or higher) except for B4D and B4S that were sequenced about half as deeply (Datasets S4 and S6). Overall methylation levels are similar to values observed in the previous studies (Dataset S10), and the mapping of methylation sites to genomic feature regions also gave consistent results (Datasets S12 and S14). Non-CpG methylation levels are marginal, as for most studies as discussed in the previous section.

The tally of new *hsm*CpG sites was 12,282, thus increasing the total observed CpG methylome to 299,737 sites (update to Fig. 4). Unique sites (update to Fig. 5) were predominantly

**Non-CpG methylation.** The extent and role of cytosine methylation in non-CpG context has not been settled in social insect genomics. Cingolani *et al.* (42) discuss experimental and computational caveats that might lead to under-detection of non-CpG methylation and report significant levels of non-CpG methylation in honeybee introns, with a potential role in the regulation of alternative splicing. While our study cannot address any experimental biases against non-CpG methylation site detection, our consistent workflow application can eliminate biases in the computational and statistical treatment of the data. Our re-evaluation of the Remnant *et al.* (45) study (section 'Using workflow-enabled re-analysis to evaluate published results' above) points to the importance of analysis parameter choices. A similar argument can be made concerning the data of He *et al.* (46) who report the average context of methylation sites as 77.55% CpG, 20.5% CHH, and 1.95% CHG, which is in stark contrast to our analysis results that found only a few hundred potential *hsm*CHH sites (Dataset S8). The criteria for site definition are not discussed in (46), but lenient treatment of the statistical problem of multiple comparisons would be one explanation of the results. For example, calling a site methylated on the evidence of one read would give context proportions of 26.21%, 63.52%, and 9.67% for CpG, CHH, and CHG, respectively, for the aggregate QWE sample. A threshold of two reads would change the proportions to 77.84%, 19.93%, and 2.24%, respectively; and a threshold of three reads would lead to proportions 95.63%, 3.96%, and 0.41%. Thus, evidence for non-CpG methylation sites seems to largely be at the statistical noise level, and the substantial number of reported sites is accounted for by the large number of genomic CHH sites.

The overall methylation levels per C-context are shown in Dataset S10 for all 58 *Apis mellifera* samples. CpG methyla-

841 seen in the semen samples (B1S, 2107 sites; B2S, 1788 sites;  
842 B4S, 1067 sites) compared to worker (512, 632, and 910 sites)  
843 and drone (269, 235, and 208 sites). Thus, this additional  
844 large data set does not greatly change our estimate of the size  
845 of the CpG methylation, nor the overall summary statistics of  
846 methylation levels.

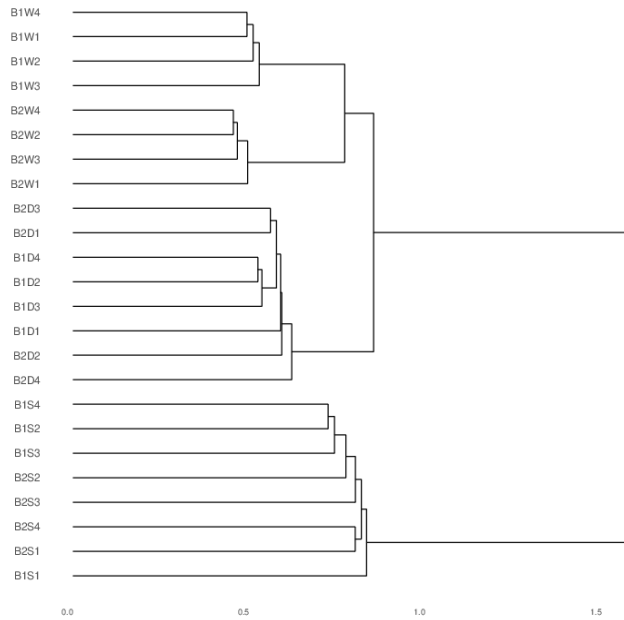

847 **Fig. 9.** Dendrogram based on correlation distances between methylation levels of the  
848 indicated samples from Yagound *et al.* (52).

847 To probe the similarity of the replicate samples, we used  
848 the same approach as introduced in the subsection 'Similarity  
849 of DNA methylation patterns' above. The equivalent of  
850 Table S2 is shown in Dataset S23. We excluded B4 samples  
851 because of the large difference in sequencing depth relative  
852 to the other samples. We then transformed the correlation  
853 and overlap values to distances by subtracting them from  
854 1 and generated dendrograms based on hierarchical clustering  
855 of the distance matrices (using standard R functions and  
856 functions from the `ggdendro` and `ggplot2` libraries; clustering  
857 by Ward.D2 method). Fig. 9 shows the clustering based on  
858 the correlation of methylation levels, and Fig. 10 shows the  
859 clustering based on the overlap index distances.

860 The correlation-based clustering shows clear grouping by  
861 type: the drone samples form a subcluster, as do the workers,  
862 and these clusters are separated from the semen cluster. In  
863 contrast, the overlap-based clusters shows consistent clustering  
864 by patriline (related drone, semen, and worker samples forming  
865 subclusters). What was initially puzzling is that figures 2 and  
866 S3 of (52) showed correlation-based clustering along patrilines  
867 like our overlap-based clustering. However, the explanation  
868 is easy enough: Yagound *et al.* build the methylation level  
869 matrix from all sites that were covered by at least 10 reads in  
870 all samples and classified as `hsmCpG` in at least one sample.  
871 The correlations derived from that matrix are heavily biased  
872 by the zero values at sites that are sufficiently covered but  
873 not methylated (`nsm` sites in our notation). Thus the authors'  
874 approach convolutes the two factors separated in our analysis:  
875 the overlap index measures how similar two sets of `hsmCpG`

876 sites are, whereas the correlation measures how similar the  
877 methylation levels are at shared `hsm` sites. The first measure  
878 reflects genetic distance (e.g., drone thorax and semen from the  
879 same individual represent the same haploid genome), whereas  
880 the second measure reflects the activity of methylation and  
881 de-methylation enzymes in the respective samples. In this  
882 purview, the data of (52) would seem to be perfectly consistent  
883 with classical genetic inheritance with subsequent methylation  
884 level control based on environmental (sample) conditions (see  
885 Discussion).

886 We should note that the clustering patterns shown in Figs. 9  
887 and 10 are unchanged for different coverage thresholds or  
888 sample subset choices. Also, clustering the methylation level  
889 matrix from Yagound *et al.* (kindly provided by the authors)  
890 after deletion of rows with zero values (which reduces the  
891 number of sites from 20523 to 5680) similarly shifted the  
892 pattern to what we show in Fig. 9. Thus, we are confident  
893 that the two components of genetic and physiological difference  
894 are properly reflected in the overlap and correlation distance  
895 measures, respectively.

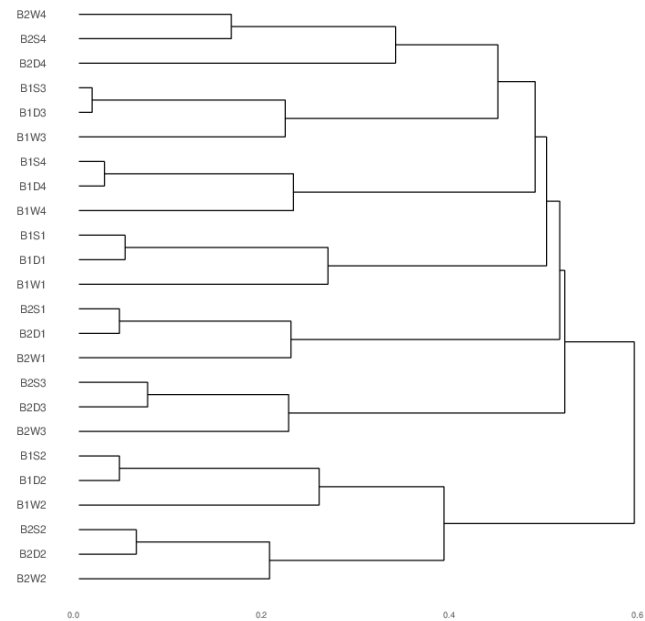

896 **Fig. 10.** Dendrogram based on overlap index distances between `hsmCpG` sets of the  
897 indicated samples from Yagound *et al.* (52).

## 898 Discussion

899 DNA methylation systems have not been found universally  
900 in all social insects, and, where present, methylation levels  
901 are very low compared to vertebrates and plants, with typical  
902 observations at around 1% of CpGs being methylated in hon-  
903 eybee tissues. The low levels complicate statistical analysis  
904 of whole genome bisulfite-sequencing experiments, as different  
905 approaches to data quality control can significantly alter re-  
906 ported methylation levels. We have presented a conceptual  
907 framework for analyzing such data in a consistent manner  
908 and implemented the computational steps in completely and  
909 easily reproducible workflows. The framework (summarized  
910 in Fig. 1) centers on the identification of sites that are suf-

909 ficiently read-covered (scd sites) to allow statistically solid  
910 determination of methylation levels at accessible (hsm) sites.  
911 We have shown that re-analysis of published studies in this  
912 way with conservative data quality control (including unique  
913 mapping of reads; removal of likely unconverted BS-seq reads  
914 and of PCR duplicates; and culling of technically biased read  
915 positions from further analyses) may suggest alternative inter-  
916 pretations of the data. Most importantly, different studies can  
917 be fairly compared in this way, with the original data equally  
918 quality-controlled and mapped to the most current genome  
919 and annotation.

920 **Identification of the *Apis mellifera* CpG methylome.** Although low  
921 levels of cytosine methylation in largely CpG context, predom-  
922 inantly in exon regions of the genome, have been consistently  
923 reported for *Apis mellifera*, only by means of an integrative  
924 study as presented here can we assess the extent to which differ-  
925 ent studies have identified the same methylation sites. This  
926 assessment is particularly challenging for the honeybee because  
927 there have been multiple genome and annotation versions in  
928 use over the period of more than ten years of methylation  
929 studies. Our results show that the set of all CpGs identi-  
930 fied as methylated in at least one experiment numbers just  
931 below 300,000 sites currently, or about 1.5% of all genomic  
932 CpGs (Fig. 4). By the same method, we find no evidence for  
933 significant levels of non-CpG methylation.

934 Our workflow implements three measures of evaluating sim-  
935 ilarity of DNA methylation patterns between samples. The  
936 overlap index measures the extent to which two sets of methy-  
937 lation sites overlap. Correlation analysis of methylation levels  
938 at common sites measures whether the shared sites are methy-  
939 lated in similar proportions in samples being compared. A  
940 flexible script applies rank-biased overlap statistics to com-  
941 pared lists of genes (or other regions) ordered by methylation  
942 level. The power of these complementary measures was demon-  
943 strated in our re-analysis of the recent Yagound *et al.* (52)  
944 study comparing methylation levels from honeybee drone tho-  
945 rax and semen samples and worker daughters derived from  
946 artificially inseminated queens. We show that the hsmCpG  
947 sets are closely related within patrines (Fig. 10), whereas  
948 methylation levels at common sites cluster by sample type  
949 (Fig. 9). This refined analysis offers a much simpler explanation  
950 for the data than the epigenetic inheritance model proposed  
951 by Yagound *et al.* that was based on a correlation analysis  
952 that convoluted these two measures of similarity. It seems to  
953 us that the most parsimonious model for the data involves  
954 sequence-determined sets of methylation-accessible CpGs in  
955 combination with dynamically determined methylation levels  
956 by physiologically regulated methylation/de-methylation ac-  
957 tivity. As the genetic background of drone thorax and semen is  
958 identical and semi-conserved in the daughter workers, hsmCpG  
959 sets are most similar within a patriline, but methylation level  
960 similarity goes with cellular type; see also the discussion in  
961 (67) and (68).

962 An open question remains concerning the sequence charac-  
963 teristics that distinguish the 1.5% of methylable CpGs from the  
964 other 98.5%. A preliminary search for characteristic sequence  
965 motifs did not result in the identification of clear signatures  
966 (Fig. 8). However, our analysis should provide good data sets  
967 for more sophisticated machine learning approaches.

**Standards of reproducibility.** Motivated by open questions con- 968  
cerning the extent and role of DNA methylation in social 969  
insects, we have implemented easily accessible computational 970  
tools for the analysis of whole genome bisulfite sequencing 971  
data. Beyond the introduction of several new concepts and 972  
measures for the presentation and statistical treatment of the 973  
data, a significant component of our work has been the em- 974  
phasis on complete reproducibility of all steps in the data 975  
processing, from download of the raw sequence data from a 976  
public repository to the generation of summary tables and 977  
figures. Our general philosophy with respect to computational 978  
reproducibility has been previously discussed (69). In brief, 979  
we argue that, for the most part, computational reproducibil- 980  
ity should encapsulate the ability of bitwise regeneration of 981  
published results. Obviously, there can be changes like time 982  
stamps or expected fluctuations in stochastic models, but the 983  
practical requirement should be that every data point in a 984  
publication can be reproduced without ambiguity. 985

986 It could be debated whether such standard of reproducibil- 987  
ity is realistic. Initially, there may seem to be few apparent 988  
incentives to put a premium on providing complete workflows. 989  
Workflows often are the result of a lot of trial and error and 990  
keeping track of what worked and what did not requires dili- 991  
gent documentation – often pieced together at the manuscript 992  
writing stage, rather than incrementally put into an executable 993  
script that retraces everything done and validated up to that 994  
point. A standard accepted by most reviewers and journals is 995  
that sufficient detail is provided in the publication to repro- 996  
duce the work “in principle.” In practice, this would typically 997  
require much effort and additional communication with the 998  
original authors, with obstacles for resolving any differences 999  
in outcome.

1000 We would like to argue that our large-scale data work with 1001  
the BWASP/R software has demonstrated that: (1) There are 1002  
now software solutions that do allow complete reproducibil- 1003  
ity of even very complex workflows. (2) Implementation of 1004  
reproducible workflows is feasible and provides no particular 1005  
technical difficulties beyond the implementation of the original 1006  
data analyses in a study. (3) The adherence to such workflow 1007  
standard for dissemination of scientific work enhances peer 1008  
review, democratizes science, and accelerates discussion and 1009  
community efforts. (4) The workflow approach opens new 1010  
possibilities for integrative studies that incorporate raw data 1011  
from multiple original sources.

1012 The workflow approach demonstrated here has the advan- 1013  
tage of capturing what researchers are already doing, whatever 1014  
software and scripts in any programming language they are 1015  
using. The only add-on is the demonstrated and verified re- 1016  
producibility of the entire data analysis, with the discussed 1017  
benefits of scalability and re-usability. For more narrowly 1018  
defined bioinformatics workflows there are now a number of 1019  
alternative workflow managements systems, adoption of which 1020  
will greatly help the cause of reproducibility (e.g., (70, 71)).

**ACKNOWLEDGMENTS.** The authors wish to thank Dr. Murat 1021  
Öztürk for contributions to the implementation of the BWASP 1022  
workflow; students Saranya Sankaranarayanan, Shengyao Chen, and 1023  
Kate Mortensen for contributions in the early stages of the code 1024  
development as well as presentation and testing of the workflow; 1025  
and Dr. Amy Toth for numerous patient discussions on the biology 1026  
of social insects. We are obliged to colleagues at NCBI who quickly 1027  
followed up on our request for an annotation of the *Stegodyphus* 1028  
*dumicola* genome. Thanks also to Dr. Boris Yagound for additional 1029



- 1030 explanation and data for the published study (52). The authors are  
1031 grateful for use of the Extreme Science and Engineering Discovery  
1032 Environment (XSEDE) Jetstream resource at Indiana University  
1033 and the Texas Advanced Computing Center through allocation  
1034 TG-BIO160012 (Computational Genomics) to V.B.. XSEDE is sup-  
1035 ported by National Science Foundation grant number ACI-1548562.  
1036 Use of the IU Carbonate system was supported in part by Lilly  
1037 Endowment, Inc., through its support for the Indiana University  
1038 Pervasive Technology Institute.
- 1039 1. Suzuki MM, Bird A (2008) DNA methylation landscapes: provocative insights from epige-  
1040 nomics. *Nature Reviews Genetics* 9(6):465–476.
- 1041 2. Feng S, et al. (2010) Conservation and divergence of methylation patterning in plants and  
1042 animals. *Proc. Natl. Acad. Sci. U.S.A.* 107(19):8689–8694.
- 1043 3. Colot V, Rossignol JL (1999) Eukaryotic DNA methylation as an evolutionary device. *BioEs-*  
1044 *says* 21(5):402–411.
- 1045 4. Glastad KM, et al. (2017) Variation in DNA methylation is not consistently reflected by sociality  
1046 in hymenoptera. *Genome Biol Evol* 9(6):1687–1698.
- 1047 5. Raddatz G, et al. (2013) Dnmt2-dependent methylomes lack defined DNA methylation pat-  
1048 terns. *Proc. Natl. Acad. Sci. U.S.A.* 110(21):8627–8631.
- 1049 6. Consortium, The Honeybee Genome Sequencing (2006) Insights into social insects from the  
1050 genome of the honeybee *Apis mellifera*. *Nature* 443(7114):931–949.
- 1051 7. Standage DS, et al. (2016) Genome, transcriptome and methylome sequencing of a primi-  
1052 tively eusocial wasp reveal a greatly reduced DNA methylation system in a social insect.  
1053 *Molecular Ecology* 25(8):1769–1784.
- 1054 8. Bonasio R, et al. (2012) Genome-wide and caste-specific DNA methylomes of the ants *Cam-*  
1055 *ponotus floridanus* and *Harpegnathos saltator*. *Curr. Biol.* 22(19):1755–64.
- 1056 9. Lyko F, et al. (2010) The honey bee epigenomes: Differential methylation of brain DNA in  
1057 queens and workers. *PLOS Biology* 8(11):e1000506.
- 1058 10. Zemach A, McDaniel IE, Silva P, Zilberman D (2010) Genome-wide evolutionary analysis of  
1059 eukaryotic DNA methylation. *Science* 328(5980):916–919.
- 1060 11. Foret S, et al. (2012) DNA methylation dynamics, metabolic fluxes, gene splicing, and alter-  
1061 native phenotypes in honey bees. *Proc. Natl. Acad. Sci. U.S.A.* 109(13):4968–73.
- 1062 12. Flores K, et al. (2012) Genome-wide association between DNA methylation and alternative  
1063 splicing in an invertebrate. *BMC Genomics* 13:480.
- 1064 13. Libbrecht R, Oxley PR, Keller L, Kronauer DJC (2016) Robust DNA methylation in the clonal  
1065 raider ant brain. *Curr. Biol.* 26(3):391–5.
- 1066 14. Li-Byarlay H, et al. (2013) RNA interference knockdown of DNA methyl-transferase 3 affects  
1067 gene alternative splicing in the honey bee. *Proc. Natl. Acad. Sci. U.S.A.* 110(31):12750–5.
- 1068 15. Hunt BG, Glastad KM, Yi SV, Goodisman MAD (2013) Patterning and regulatory associations  
1069 of dna methylation are mirrored by histone modifications in insects. *Genome Biology and*  
1070 *Evolution* 5(3):591–598.
- 1071 16. Bird A (2002) DNA methylation patterns and epigenetic memory. *Genes & Development*  
1072 16(1):6–21.
- 1073 17. Lorincz MC, Dickerson DR, Schmitt M, Groudine M (2004) Intragenic DNA methylation alters  
1074 chromatin structure and elongation efficiency in mammalian cells. *Nature Structural &*  
1075 *Molecular Biology* 11(11):1068–1075.
- 1076 18. Zilberman D, Henikoff S (2007) Genome-wide analysis of DNA methylation patterns. *Devel-*  
1077 *opment* 134(22):3959–3965.
- 1078 19. Luco RF, et al. (2010) Regulation of alternative splicing by histone modifications. *Science*  
1079 327(5968):996–1000.
- 1080 20. Maunakea AK, et al. (2010) Conserved role of intragenic DNA methylation in regulating alter-  
1081 native promoters. *Nature* 466(7303):253–257.
- 1082 21. Zilberman D (2017) An evolutionary case for functional gene body methylation in plants and  
1083 animals. *Genome Biology* 18(1):87.
- 1084 22. Dyson CJ, Goodisman MAD (2020) Gene duplication in the honeybee: Patterns of DNA  
1085 methylation, gene expression, and genomic environment. *Mol. Biol. Evol.* 37(8):2322–2331.
- 1086 23. Kucharski R, Maleszka J, Foret S, Maleszka R (2008) Nutritional control of reproductive status  
1087 in honeybees via DNA methylation. *Science* 319(5871):1827–1830.
- 1088 24. Shi YY, et al. (2013) Genomewide analysis indicates that queen larvae have lower methylation  
1089 levels in the honey bee (*Apis mellifera*). *Naturwissenschaften* 100(2):193–7.
- 1090 25. Yang SX, Guo C, Zhao XT, Sun JT, Hong XY (2018) Divergent methylation pattern in adult  
1091 stage between two forms of *Tetranychus urticae* (Acari: Tetranychidae). *Insect Science*  
1092 25(4):667–678.
- 1093 26. Elango N, Hunt BG, Goodisman MAD, Yi SV (2009) DNA methylation is widespread and  
1094 associated with differential gene expression in castes of the honeybee, *Apis mellifera*. *Proc.*  
1095 *Natl. Acad. Sci. U.S.A.* 106(27):11206–11.
- 1096 27. Kay S, Skowronski D, Hunt BG (2018) Developmental DNA methyltransferase expression in  
1097 the fire ant *Solenopsis invicta*. *Insect Science* 25(1):57–65.
- 1098 28. Vilcinskas A (2016) The role of epigenetics in host-parasite coevolution: lessons from the  
1099 model host insects *Galleria mellonella* and *Tribolium castaneum*. *Zoology (Jena)* 119(4):273–  
1100 280.
- 1101 29. Biergans SD, Jones JC,reiber N, Galizia CG, Szyszka P (2012) DNA methylation medi-  
1102 ates the discriminatory power of associative long-term memory in honeybees. *PLoS One*  
1103 7(6):e39349.
- 1104 30. Lockett GA, Helliwell P, Maleszka R (2010) Involvement of DNA methylation in memory pro-  
1105 cessing in the honey bee. *Neuroreport* 21(12):812–816.
- 1106 31. Gong Z, Tan K, Nieh JC (2018) First demonstration of olfactory learning and long-term mem-  
1107 ory in honey bee queens. *J. Exp. Biol.* 221(Pt 14).
- 1108 32. Herb BR, et al. (2012) Reversible switching between epigenetic states in honeybee behavioral  
1109 subcastes. *Nature Neuroscience* 15(10):1371–1373.
- 1110 33. Wedd L, Kucharski R, Maleszka R (2016) Differentially methylated obligatory epialleles mod-  
1111 ulate context-dependent LAM gene expression in the honeybee *Apis mellifera*. *Epigenetics*  
11(1):1–10.
34. Arsenault SV, Hunt BG, Rehan SM (2018) The effect of maternal care on gene expression  
and DNA methylation in a subsocial bee. *Nature Communications* 9(1):3468.
35. Herb BR, Shook MS, Fields CJ, Robinson GE (2018) Defense against territorial intrusion is  
associated with DNA methylation changes in the honey bee brain. *BMC Genomics* 19(1):216.
36. Cardoso-Júnior CAM, Guidugli-Lazzarini KR, Hartfelder K (2018) DNA methylation affects  
the lifespan of honey bee (*Apis mellifera* L.) workers - Evidence for a regulatory module  
that involves vitellogenin expression but is independent of juvenile hormone function. *Insect*  
*Biochem. Mol. Biol.* 92:21–29.
37. Yan H, et al. (2015) DNA methylation in social insects: how epigenetics can control behavior  
and longevity. *Annual Review of Entomology* 60:435–452.
38. Morandin C, Brendel VP, Sundström L, Helanterä H, Mikheyev AS (2019) Changes in gene  
DNA methylation and expression networks accompany caste specialization and age-related  
physiological changes in a social insect. *Mol. Ecol.* 28(8):1975–1993.
39. Marshall H, Lonsdale ZN, Mallon EB (2019) Methylation and gene expression differences  
between reproductive and sterile bumblebee workers. *Evol Lett* 3(5):485–499.
40. Wang Y, et al. (2006) Functional CpG methylation system in a social insect. *Science*  
314(5799):645–7.
41. Bewick AJ, Vogel KJ, Moore AJ, Schmitz RJ (2017) Evolution of DNA methylation across  
insects. *Mol. Biol. Evol.* 34(3):654–665.
42. Cingolani P, et al. (2013) Intronic non-cg dna hydroxymethylation and alternative mrna splic-  
ing in honey bees. *BMC Genomics* 14(1):666.
43. Drewell RA, et al. (2014) The dynamic DNA methylation cycle from egg to sperm in the honey  
bee *Apis mellifera*. *Development* 141(13):2702–11.
44. Galbraith DA, Yang X, Niño EL, Yi S, Grozinger C (2015) Parallel epigenomic and transcrip-  
tomic responses to viral infection in honey bees (*Apis mellifera*). *PLOS Pathogens* 11(3):1–  
24.
45. Remnant EJ, et al. (2016) Parent-of-origin effects on genome-wide DNA methylation in the  
Cape honey bee (*Apis mellifera capensis*) may be confounded by allele-specific methylation. *BMC*  
*Genomics* 17:226.
46. He XJ, et al. (2017) Making a queen: an epigenetic analysis of the robustness of the honey-  
bee (*Apis mellifera*) queen developmental pathway. *Molecular Ecology* 26(6):1598–1607.
47. Li Y, et al. (2017) Genome-wide DNA methylation changes associated with olfactory learning  
and memory in *Apis mellifera*. *Scientific Reports* 7(1):17017.
48. Xu X, et al. (2019) Evolutionary transition between invertebrates and vertebrates via methy-  
lation reprogramming in embryogenesis. *National Science Review* 6(5):993–1003.
49. Yagound B, Smith NMA, Buchmann G, Oldroyd BP, Remnant EJ (2019) Unique DNA methy-  
lation profiles are associated with *cis*-variation in honey bees. *Genome Biol Evol* 11(9):2517–  
2530.
50. Harris KD, Lloyd JPB, Domb K, Zilberman D, Zemach A (2019) DNA methylation is maintained  
with high fidelity in the honey bee germline and exhibits global non-functional fluctuations  
during somatic development. *Epigenetics & Chromatin* 12(1):62.
51. Yi Y, et al. (2020) Transgenerational accumulation of methylome changes discovered in com-  
mercially reared honey bee (*Apis mellifera*) queens. *Insect Biochem. Mol. Biol.* 127:103476.
52. Yagound B, Remnant EJ, Buchmann G, Oldroyd BP (2020) Intergenerational transfer of DNA  
methylation marks in the honey bee. *Proceedings of the National Academy of Sciences*  
117(51):32519–32527.
53. Elsie CG, et al. (2014) Finding the missing honey bee genes: lessons learned from a genome  
upgrade. *BMC Genomics* 15:86.
54. Krueger F, Andrews SR (2011) Bismark: a flexible aligner and methylation caller for bisulfite-  
seq applications. *Bioinformatics* 27(11):1571–1572.
55. Langmead B, Salzberg SL (2012) Fast gapped-read alignment with Bowtie 2. *Nature Methods*  
9(4):357–359.
56. Free Software Foundation (2020) GNU Make. <https://www.gnu.org/software/make/>.
57. Sochat V (2017) Singularity registry: open source registry for singularity images. *Journal of*  
*Open Source Software* 2.18:426.
58. Webber W, Moffat A, Zobel J (2010) A similarity measure for indefinite rankings. *ACM Trans.*  
*Inf. Syst.* 28(4).
59. Patalano S, Hore TA, Reik W, Sumner S (2012) Shifting behaviour: epigenetic reprogramming  
in eusocial insects. *Curr. Opin. Cell Biol.* 24(3):367–73.
60. Karlin S, Brendel V (1992) Chance and statistical significance in protein and DNA sequence  
analysis. *Science* 257(5066):39–49.
61. McKenzie SK, Kronauer DJ (2018) The genomic architecture and molecular evolution of ant  
odorant receptors. *Genome Research* 28(11):1757–1765.
62. Liu S, Aagegaard A, Bechsgaard J, Bilde T (2019) DNA methylation patterns in the social  
spider, *Stegodyphus dumicola*. *Genes* 10(2).
63. Wallberg A, et al. (2019) A hybrid de novo genome assembly of the honeybee, *Apis mellifera*,  
with chromosome-length scaffolds. *BMC Genomics* 20(1):275.
64. NCBI (2018) *Apis mellifera* genome assembly HA3.1; [https://www.ncbi.nlm.nih.gov/assembly/GCF\\_003254395.2/](https://www.ncbi.nlm.nih.gov/assembly/GCF_003254395.2/).
65. NCBI (2018) *Apis mellifera* Annotation Release 104; [https://www.ncbi.nlm.nih.gov/genome/annotation\\_euk/Apis\\_mellifera/104/](https://www.ncbi.nlm.nih.gov/genome/annotation_euk/Apis_mellifera/104/).
66. Bebane PSA, et al. (2019) The effects of the neonicotinoid imidacloprid on gene expres-  
sion and DNA methylation in the buff-tailed bumblebee *Bombus terrestris*. *Proc. Biol. Sci.*  
286(1905):20190718.
67. Soley FG (2021) Still no evidence for transgenerational inheritance or absence of epigenetic  
reprogramming in the honey bee. *Proceedings of the National Academy of Sciences* 118(28).
68. Yagound B, Remnant EJ, Buchmann G, Oldroyd BP (2021) Reply to Soley: DNA methylation  
marks are stably transferred across generations in honey bees. *Proceedings of the National*  
*Academy of Sciences* 118(28).
69. Brendel VP (2018) From small RNA discoveries to a new paradigm in computational ge-  
nomics? *New Phytologist* 220(3):659–660.
70. Baichoo S, et al. (2018) Developing reproducible bioinformatics analysis workflows for het-  
erogeneous computing environments to support African genomics. *BMC Bioinformatics*  
19:95

|                                                                                                                                                                          |              |
|--------------------------------------------------------------------------------------------------------------------------------------------------------------------------|--------------|
| 19(1):457.                                                                                                                                                               | 1196         |
| 71. Jackson M, Kavoussanakis K, Wallace E (2021) Using prototyping to choose a bioinformatics workflow management system. <i>PLoS Computational Biology</i> 17:e1008622. | 1197<br>1198 |
